# Supplementary material
Source: publisher figshare collection journal article supplement (https://acs.figshare.com/ndownloader/files/4408699)
Supplement: Supplementary file 1 [file 4408699]

## Supporting Information

# Thermal stability and morphological transformations of $\text{Au}_{\text{core}}\text{-Co}_{\text{shell}}$ nanocrucibles

Tianlong Wen and Kannan M. Krishnan\*

Department of Materials Science and Engineering, University of Washington, Box 352120, Seattle, WA  
98195-2120, USA

\*E-mail:kannanmk@uw.edu

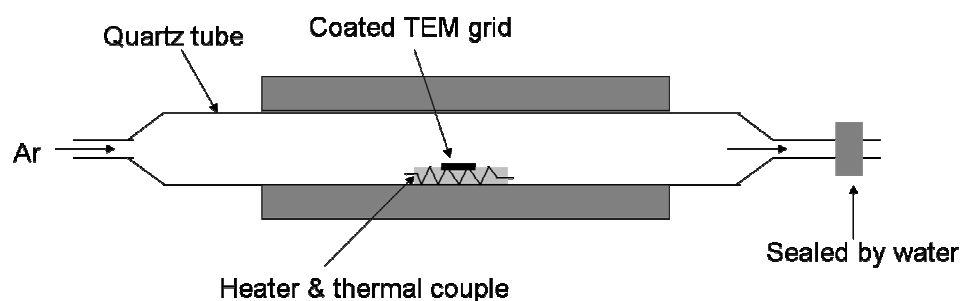

Scheme S1: Furnace for *ex-situ* heating experiment of  $\text{Au}_{\text{core}}\text{-Co}_{\text{shell}}$  nanoparticles

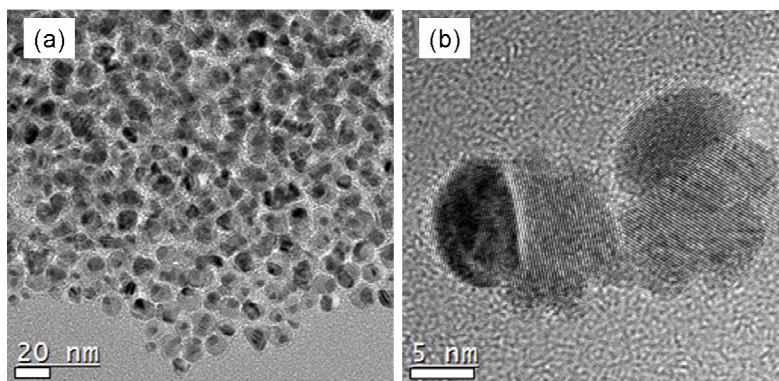

Figure S1. Bright field TEM image of the coalesced  $\text{Au}_{\text{core}}\text{-Co}_{\text{shell}}$  nanoparticles at the dense area in (a) and HRTEM of two coalesced  $\text{Au}_{\text{core}}\text{-Co}_{\text{shell}}$  nanoparticles in (b) after heating at 400°C for 10 hours. The interparticle coalescence is not considered in this manuscript.

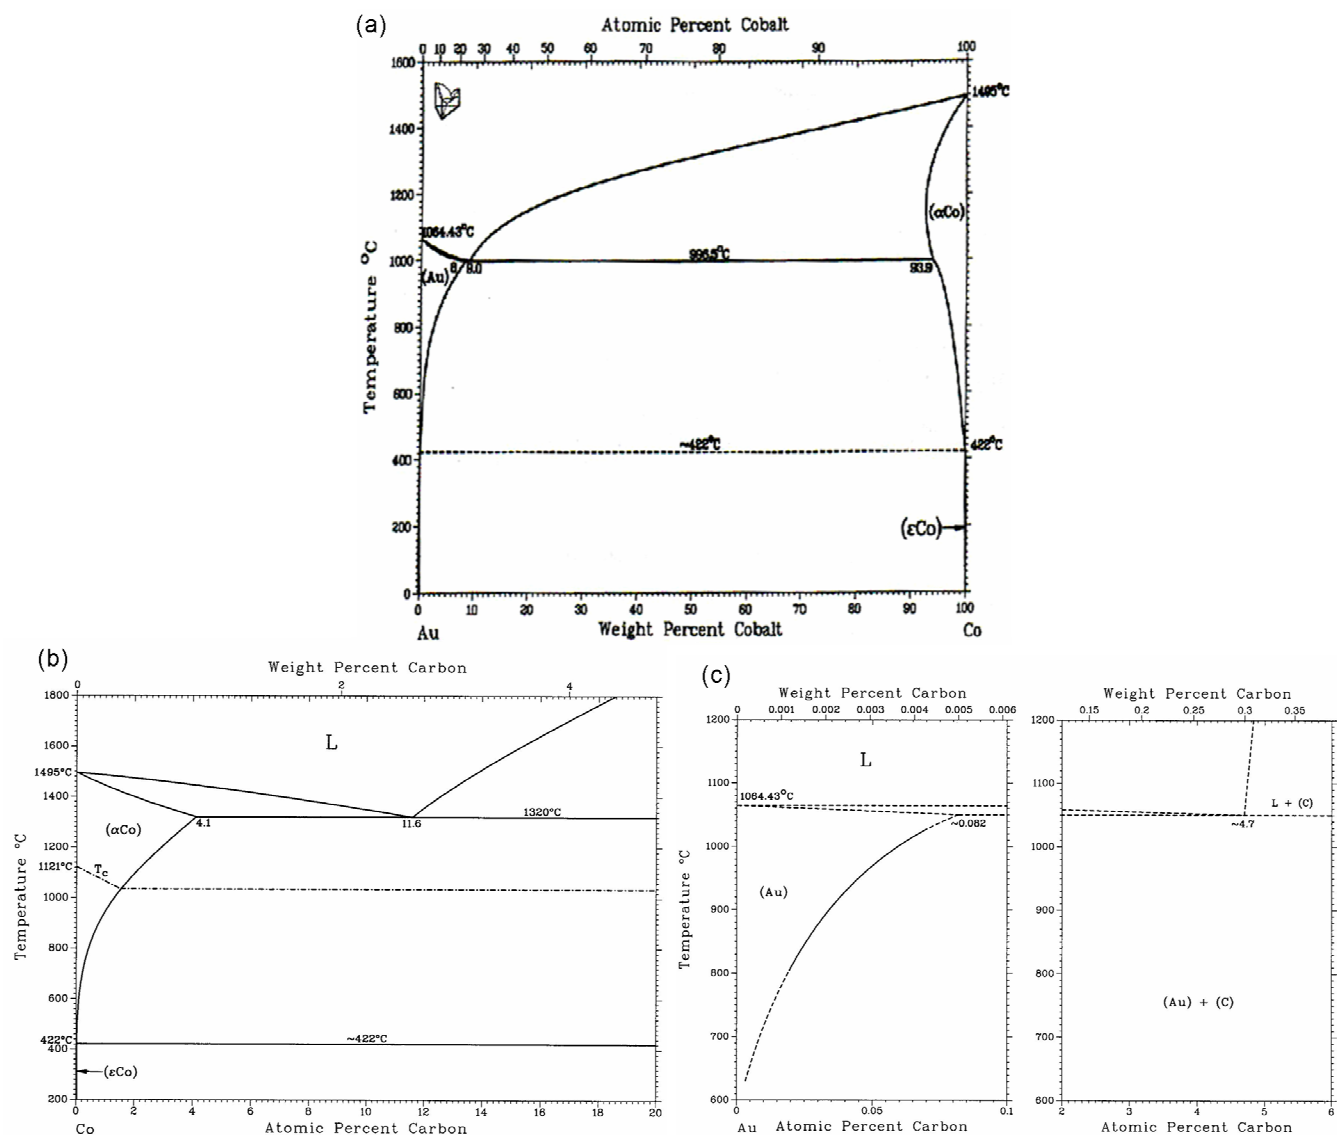

Figure S2 Binary phase diagram of Au-Co system in (a), Co-C system in (b) and Au-C system (magnified for low percentage) in (c). The three elements are mutually immiscible below 500°C with solubility ~ppm [reference: T. B. Massalski, in *Binary Alloy Phase Diagrams*, 2<sup>nd</sup> ed., edited by T. B. Massalski, H. Okamoto, P. R. Subramanian, and L. Kacprak , ASM International, Metals Park, OH, 1990]

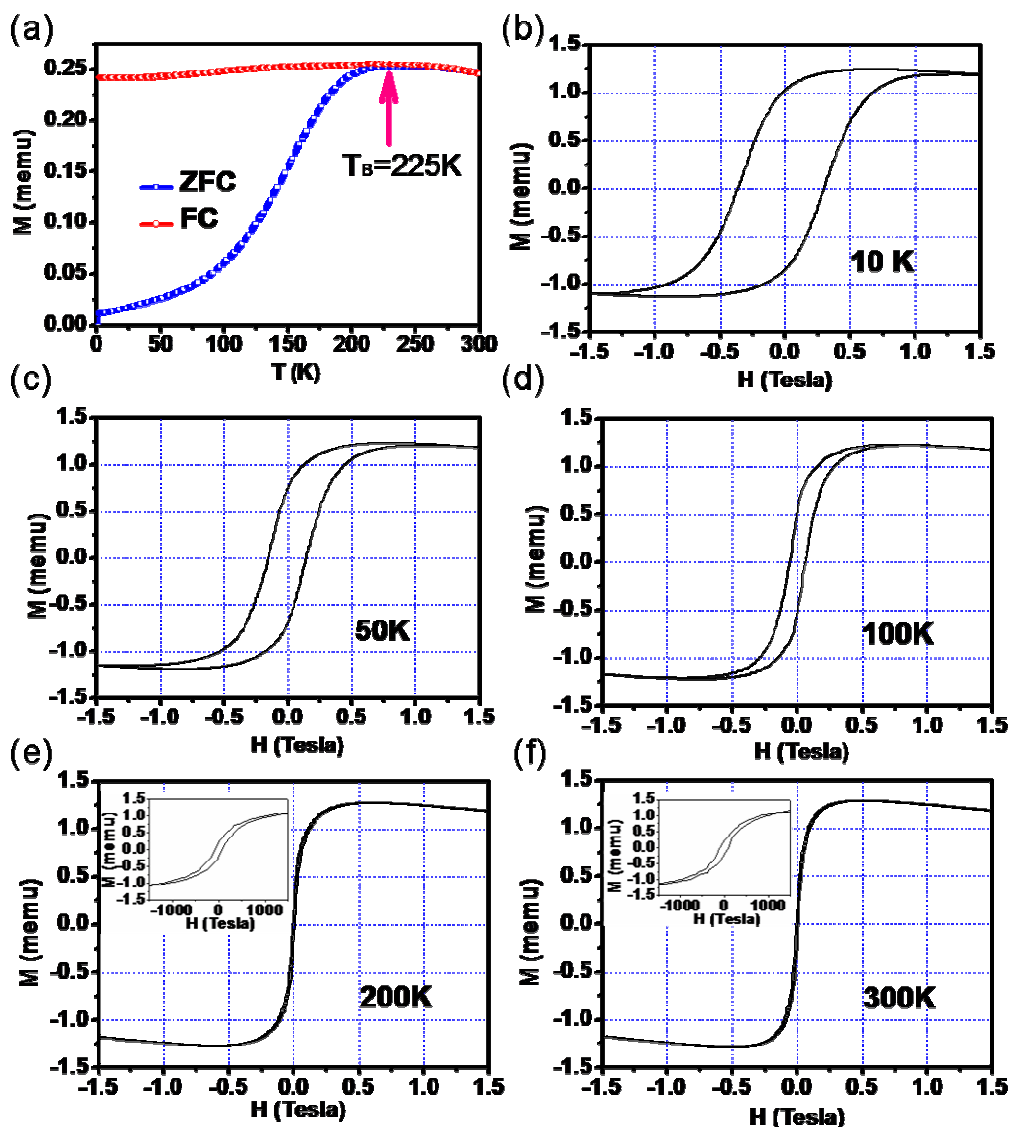

Figure S3 Zero-field-cooling (ZFC) and field-cooling (FC) measurement of as-synthesized  $\text{Au}_{\text{core}}\text{-Co}_{\text{shell}}$  nanoparticles in (a) give blocking temperature,  $T_B \sim 225\text{ K}$ , indicating superparamagnetic behavior of as-synthesized core-shell nanoparticles; and magnetic hysteresis loop with decreasing coercivity as temperature increase from 10 K, 50 K, 100 K, 200 K to 300 K in (b), (c), (d), (e) and (f), respectively.

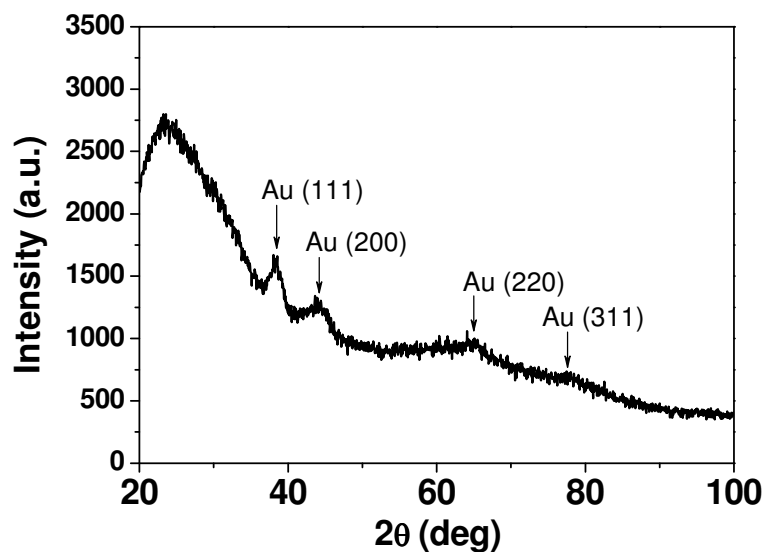

Figure S4 X-ray  $\theta$ - $2\theta$  scan of as-synthesized  $\text{Au}_{\text{core}}\text{-Co}_{\text{shell}}$  nanoparticles by  $\text{CuK}\alpha$  radiation; only FCC Au peaks are seen. The absence of cobalt diffraction peaks is due to the small cobalt grain generated by heterogeneous nucleation.

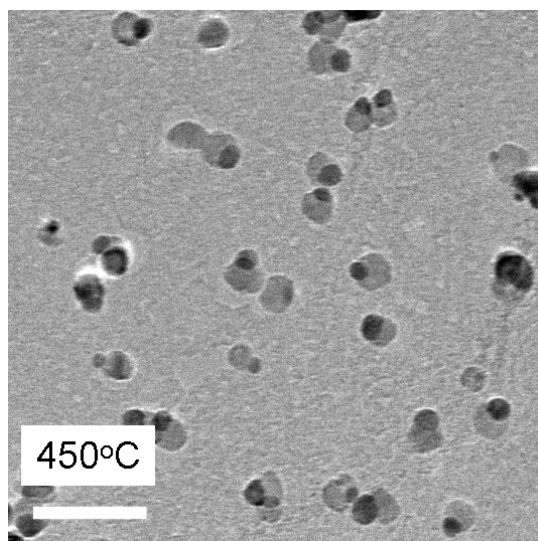

Figure S5 Bright field TEM image of  $\text{Au}_{\text{core}}\text{-Co}_{\text{shell}}$  nanoparticles after being annealed at  $450^{\circ}\text{C}$  for 10 hours. The scale bar is 30nm.
